# Supplementary material for: Derivation of Mouse Parthenogenetic Advanced Stem Cells
Source: MDPI journal article supplement (doi:10.3390/ijms22168976), 2021-08-20
Supplement: s1 [file s1]

# Supplementary Material

Figure S1

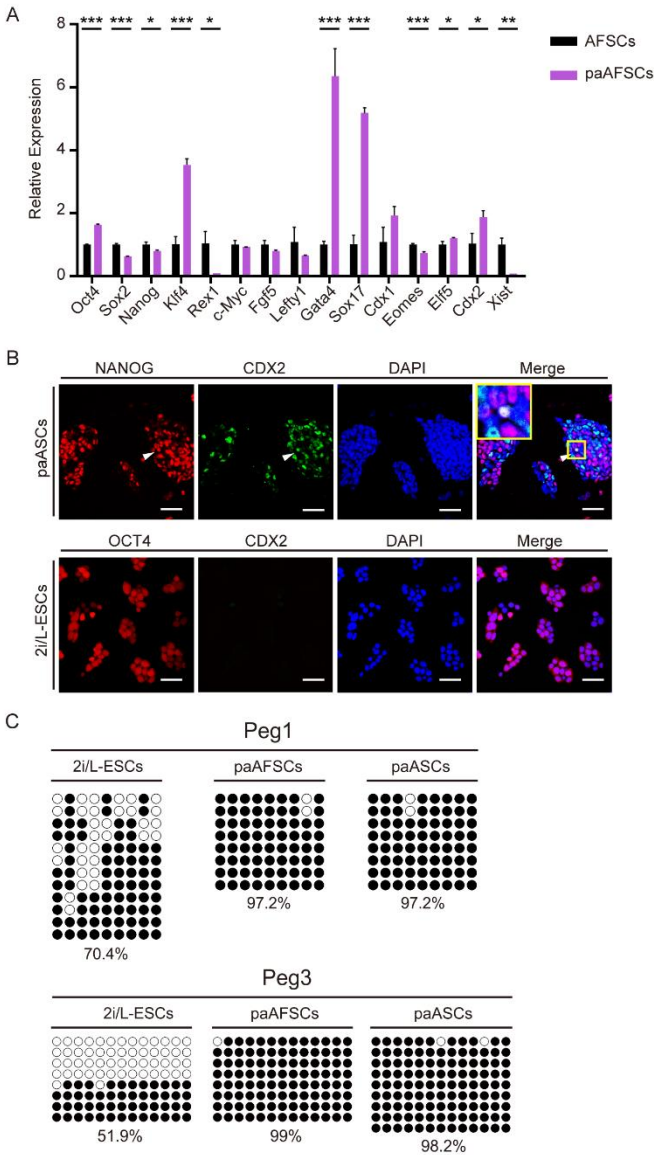

**Figure S1.** The characteristics of paAFSCs and paASCs. **(A)** RT-qPCR of key pluripotent genes, germ layer related genes and Xist in AFSCs and paAFSCs which derived from 129/Sv parthenogenetic diploid blastocysts. Error bars indicate three independent biological replicates (mean±SD). \* $p < 0.05$ , \*\* $p < 0.001$ , \*\*\* $p < 0.0001$ . **(B)** Immunostaining for NANOG and CDX2 in 2i/L-ESCs and paASCs. White arrows point to the cell both expressed NANOG and CDX2. Scale bars: 50  $\mu\text{m}$ . **(C)** Methylation status of Peg1 and Peg3 in 2i/L-ESCs, paAFSCs and paASCs.

Figure S2

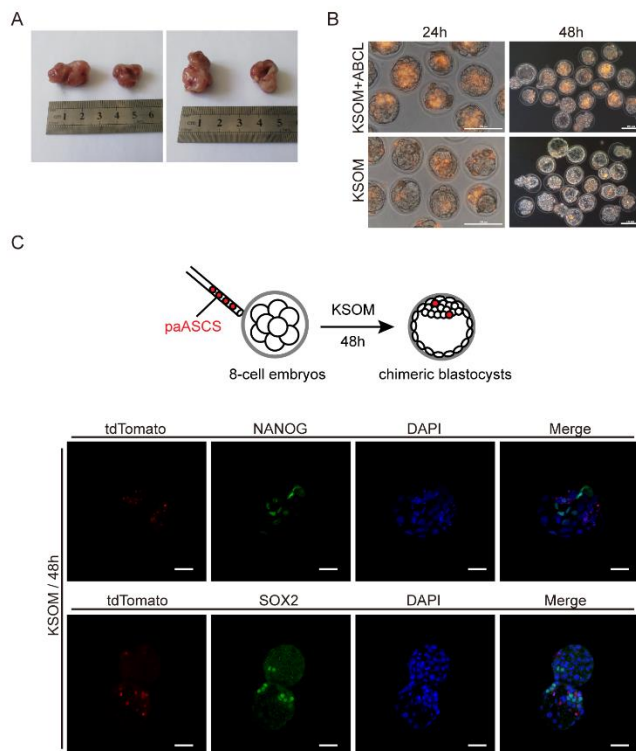

**Figure S2.** Development potential of paASCs. **(A)** Teratomas derived from paASCs. **(B)** The developed embryos from 8-cell embryos which injected with tdTomato paASCs cultured for 24 h and 48 h in KSOM and KA medium. Scale bars: 100  $\mu$ m. **(C)** Immunostaining of NANOG and SOX2 in blastocysts developed from 8-cell embryos which injected with tdTomato paASCs cultured for 48 h in KSOM medium. Scale bars: 50  $\mu$ m.

**Table S1** Sequences of primers

| qPCR primers |                          |                        |
|--------------|--------------------------|------------------------|
| Gene name    | Forward primer           | Reverse primer         |
| Oct4         | GCTTGGGCTAGAGAAGGATGTG   | TGGCGCCGGTTACAGAAC     |
| Sox2         | CATGAGAGCAAGTACTGGCAAG   | CCAACGATATCAACCTGCATGG |
| Nanog        | AAACCAGTGGTTGAAGACTAGCAA | GGTGCTGAGCCCTTCTGAATC  |
| Klf4         | TCAAGTTCCCAGCAAGTCAG     | CATCCAGTATCAGACCCCATC  |

|        |                                   |                                       |
|--------|-----------------------------------|---------------------------------------|
| Rex1   | AAGCCGTATCAGTGCACGTTCTGAAG<br>GCT | ATGCGTGTATCCCCAGTGCCTCTGT<br>CAT      |
| C-myc  | GACTCTGAAGAAGAGCAAGAAGATG<br>A    | TCCACAGACACCACATCAATTTC               |
| Fgf5   | AAACTCCATGCAAGTGCCAAAT            | TCTCGGCCTGTCTTTTCAGTTC                |
| Lefty1 | TGGACAAGGCTGATGAGGAA              | TGGCATGGCTGTGTTGTAGC                  |
| Gata4  | TTCCTCTCCCAGGAACATCAAA            | GCTGCACAACTGGGCTCTACTT                |
| Eomes  | CGGCAAAGCGGACAATAACA              | GGAGCCAGTGTTAGGAGATTC                 |
| Sox17  | GTCAACGCCTTCCAAGACTTG             | GTAAAGGTGAAAGGCGAGGTG                 |
| Cdx1   | GTAAGACCCGAACCAAGGAC              | CAGGATATCCTAGGGTAGAACTC<br>CTCCTTGACG |
| Elf5   | GGACCGATCTGTTCAGCAAT              | GGGTGCACTGATGTCCAGTA                  |
| Cdx2   | CCTGCGACAAGGGCTTGTTTAG            | TCCCGACTTCCCTTCACCATAC                |
| Xist   | CTCATAGTAGTGGCCGAGTA              | TAAGCCCGTTAAGTAGTCCTT                 |
| Gapdh  | ACCACAGTCCATGCCATCAC              | TCCACCACCCTGTTGCTGTA                  |

**Table S2** Antibodies

| Reagent                    | Source         | Identifier | Dilution Ratio |
|----------------------------|----------------|------------|----------------|
| <b>Antibodies for IF</b>   |                |            |                |
| Mouse monoclonal Oct4      | BD Biosciences | 611203     | 1:200          |
| Goat polyclonal Sox2       | Santa cruz     | Sc-17320   | 1:200          |
| Rat monoclonal Nanog       | eBioscience    | 14-5761    | 1:500          |
| Rabbit polyclonal H3K27me3 | Millipore      | 07-449     | 1:500          |

|                                        |            |             |       |
|----------------------------------------|------------|-------------|-------|
| Mouse monoclonal Cdx2                  | Biogenex   | Cdx2-88     | 1:200 |
| Rabbit polyclonal RFP                  | Rockland   | 600-401-379 | 1:200 |
| Alexa Fluor 488 donkey anti-mouse IgG  | invitrogen | A21202      | 1:500 |
| Alexa Fluor 488 donkey anti-goat IgG   | invitrogen | A11055      | 1:500 |
| Alexa Fluor 488 donkey anti-rat IgG    | invitrogen | A21208      | 1:500 |
| Alexa Fluor 568 donkey anti-rabbit IgG | invitrogen | A10042      | 1:500 |
| Alexa Fluor 568 donkey anti-mouse IgG  | invitrogen | A10037      | 1:500 |
